# Supplementary material for: Interfacial engineering facilitating robust Li6.35Ga0.15La3Zr1.8Nb0.2O12 for all-solid-state lithium batteries
Source: Royal Society of Chemistry journal article supplement (doi:10.1039/d1se00061f), 2021-01-01
Supplement: d1se00061f1.pdf [file d1se00061f1.pdf]

## Supporting Information

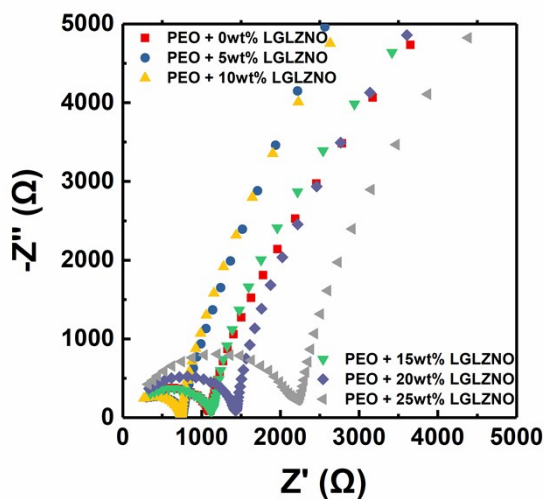

**Figure S1.** Nyquist plots of the composite electrolytes with changed LGLZNO contents in PEO under 30 °C.

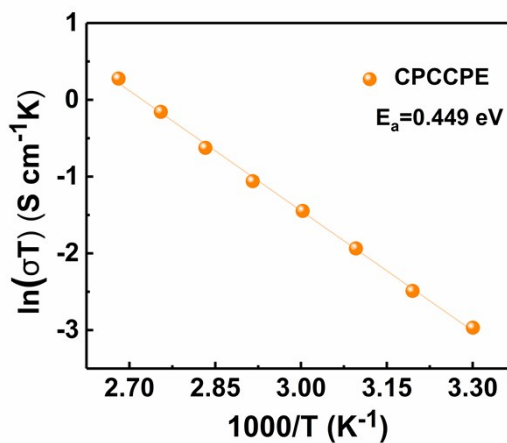

**Figure S2.** Ionic conductivity of CPCPE versus temperature and corresponding activation energy ( $E_a$ ).

The  $E_a$  of CPCPE can be obtained from the equation S1:

$$\sigma T = A \exp\left(\frac{-E_a}{k_B T}\right)$$

Where  $\sigma$  is the conductivity,  $T$  is the absolute temperature,  $A$  and  $k_B$  are the pre-exponential parameter, Boltzmann's constant.

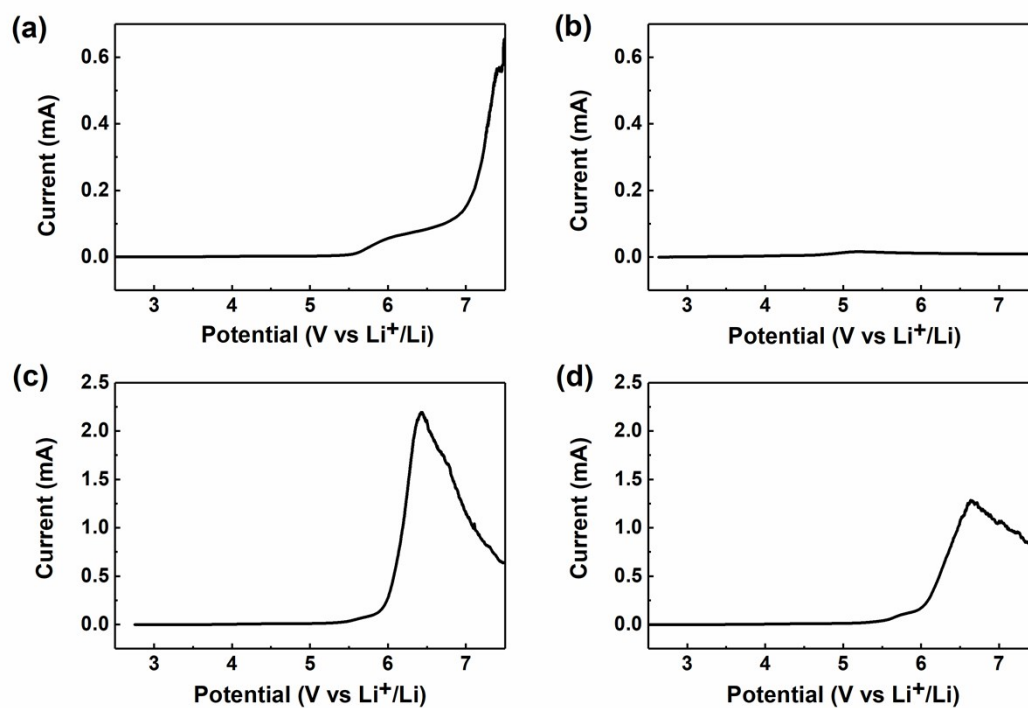

**Figure S3.** The LSV curves with different compositions at 60 °C. (a) Li/LGLZNO+PEO/stainless steel, LGLZNO+PEO represents the LGLZNO electrolytes with both sides coated by PEO; (b) Li/LGLZNO/stainless steel, (c) Li/PEO/stainless steel and (d) Li/composite electrolyte/stainless steel, the composite electrolyte means the 10 wt.% LGLZNO powder dispersed into PEO matrix.

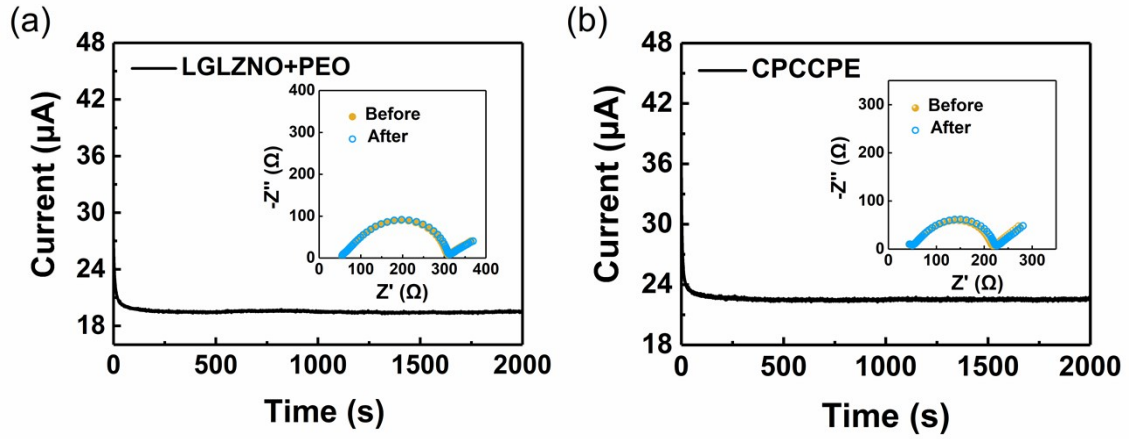

**Figure S4.** The chronoamperometry curves and the corresponding Nyquist plots (insert figures) before and after polarization for Li/Li symmetrical batteries of (a) LGLZNO and (b) CPCPE.

The Li ions transfer number ( $t_{Li^+}$ ) can be obtained from the equation S1:

$$t_{Li^+} = \frac{I_s(\Delta V - I_0 R_0)}{I_0(\Delta V - I_s R_s)} \quad S2$$

Where  $\Delta V$  is the polarization potential (10 mV),  $I_0$  and  $R_0$  are the initial current and resistance, and  $I_s$  and  $R_s$  are the steady-state current and resistance.

**Table S1.** The Li-ion transference number ( $t_{Li^+}$ ) of LGLZNO+PEO and CPCPE at 60 °C.

| Samples    | $I_0(\mu A)$ | $I_s(\mu A)$ | $R_0(\text{ohm})$ | $R_s(\text{ohm})$ | $\Delta V(\text{mV})$ | $t_{Li^+}$ |
|------------|--------------|--------------|-------------------|-------------------|-----------------------|------------|
| LGLZNO+PEO | 27.79        | 19.46        | 308.5             | 313.5             | 10                    | 0.256      |
| CPCPE      | 35.85        | 22.58        | 217               | 225               | 10                    | 0.284      |

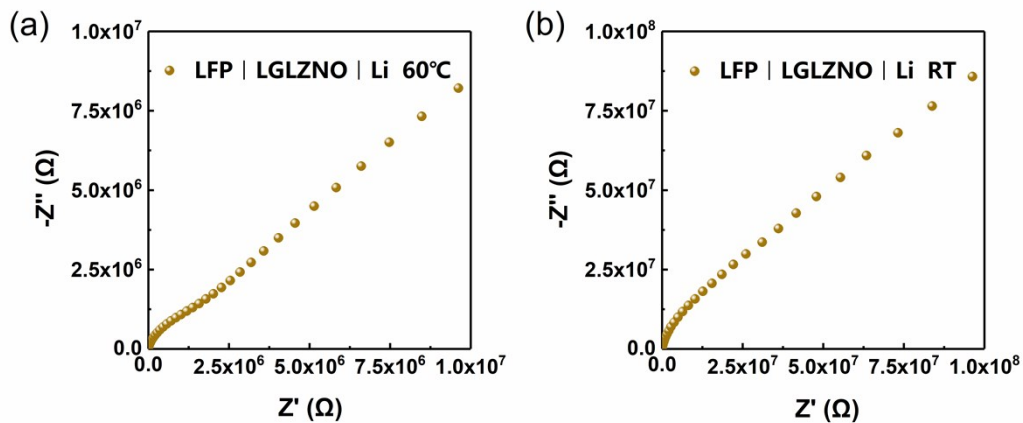

**Figure S5.** (a, b) Nyquist plots of LFP/LGLZNO/Li full cells at 60 °C and LFP/GLZNO/Li full cells at RT.

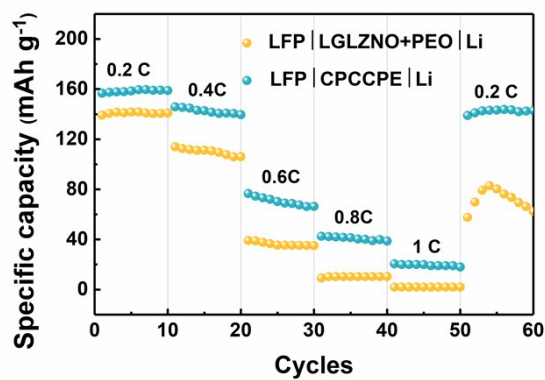

**Figure S6.** Rate performances at 60 °C of LFP/LGLZNO+PEO/Li and LFP/CPCCPE/Li full cells.

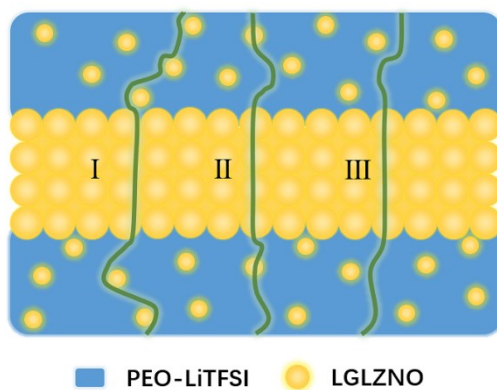

**Figure S7.** Three possible pathways for Li-ions transportation in CPCCPE.

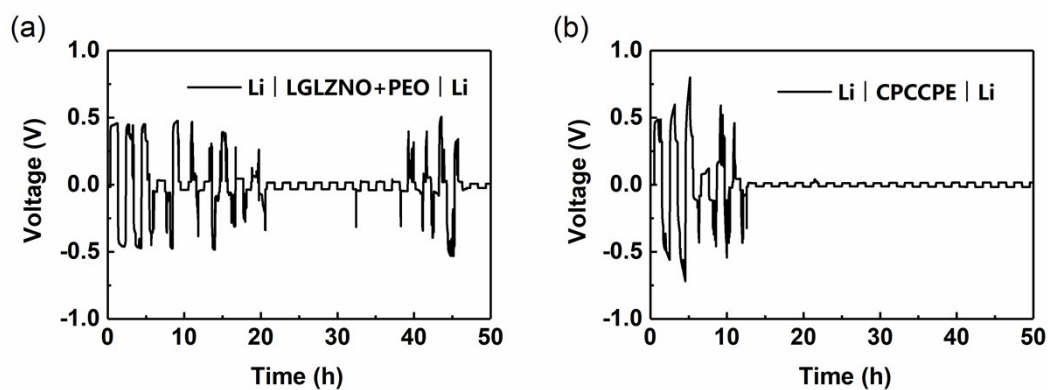

**Figure S8.** (a, b) Voltage profiles of the lithium plating/stripping cycling of Li/LGLZNO+PEO/Li and Li/CPCCPE/Li with a current density of  $100 \mu\text{A cm}^{-2}$  at RT.

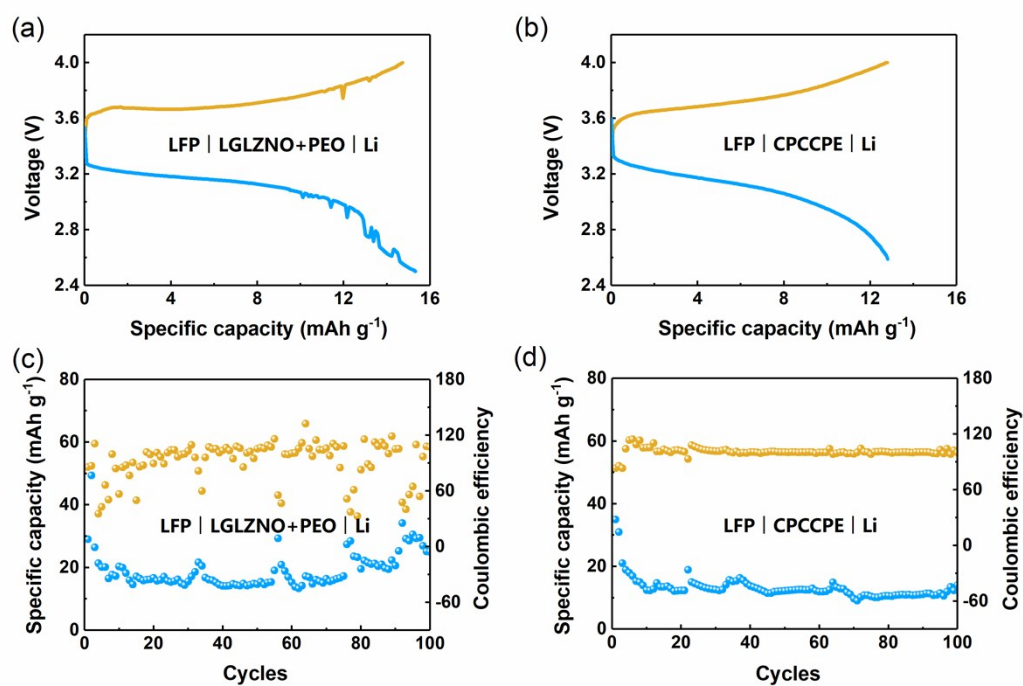

**Figure S9.** (a, b) Charge/discharge voltage profiles of the 15th cycle at  $0.2 \text{ C}$  and RT for LFP/LGLZNO+PEO/Li and LFP/CPCCPE/Li full cells. (c, d) Cycling performance of LFP/ LGLZNO+PEO/Li and LFP/CPCCPE/Li full cells at  $0.2 \text{ C}$  and RT.

**Table S2.** Performance comparison of polymer and inorganic ceramic as composite electrolyte in full cells with LFP as cathode material. (Note: “+” means to mix two or three together and “/” means that different electrolyte layers are superimposed together).

| Solid electrolyte | Specific Test parameters | capacity after 100 cycles (mAh g <sup>-1</sup> ) | Coulomb efficiency (%) | Maximum capacity retention after 100 cycles (%) | Ref.      |
|-------------------|--------------------------|--------------------------------------------------|------------------------|-------------------------------------------------|-----------|
| PEO/LLZTO         | 90 °C 0.2 C              | ≈136                                             | ≈99.6                  | ≈95                                             | [1]       |
| PCPSE/LATP        | 65 °C 0.2 C              | 130                                              | 97-100                 | ≈95.5                                           | [2]       |
| PEO+LLZTO         | 60 °C 1 C                | 140                                              | >99                    | ≈100                                            | [3]       |
| PEO+PVDF+LGLZBO   | 60 °C 0.1 C              | 128.3                                            | ≈100                   | ≈96.5                                           | [4]       |
| PEO+LLZO          | 55 °C 0.2 C              | ≈151.5                                           | >99.8                  | ≈94.5                                           | [5]       |
| PVDF+LLZTO        | 55 °C 0.2 C              | ≈143                                             | ≈99.6                  | 94.7                                            | [6]       |
| PEO+LGLZNO/LGLZNO | 60 °C 0.2 C              | 158                                              | ≈99.8                  | ≈100                                            | This work |

## References

- [1] S.-S. Chi; Y. Liu; N. Zhao; X. Guo; C.-W. Nan; L.-Z. Fan, Solid polymer electrolyte soft interface layer with 3D lithium anode for all-solid-state lithium batteries, *Energy Storage Mater.* 17 (2019) 309-316.
- [2] W. Zhou; S. Wang; Y. Li; S. Xin; A. Manthiram; J. B. Goodenough, Plating a Dendrite-Free Lithium Anode with a Polymer/Ceramic/Polymer Sandwich Electrolyte, *J. Am. Chem. Soc.* 138 (2016) 9385-9388.
- [3] T. Thompson; S. Yu; L. Williams; R. D. Schmidt; R. Garcia-Mendez; J. Wolfenstine; J. L. Allen; E. Kioupakis; D. J. Siegel; J. Sakamoto, Electrochemical Window of the Li-Ion Solid Electrolyte Li<sub>7</sub>La<sub>3</sub>Zr<sub>2</sub>O<sub>12</sub>, *ACS Energy Lett.* 2 (2017) 462-468.
- [4] J. Li; K. Zhu; Z. Yao; G. Qian; J. Zhang; K. Yan; J. Wang, A promising composite solid electrolyte incorporating LLZO into PEO/PVDF matrix for all-solid-state lithium-ion batteries, *Ionics* 26 (2019) 1101-1108.
- [5] H. Duan; Y.-X. Yin; Y. Shi; P.-F. Wang; X.-D. Zhang; C.-P. Yang; J.-L. Shi; R. Wen; Y.-G. Guo; L.-J. Wan, Dendrite-Free Li-Metal Battery Enabled by a Thin Asymmetric Solid Electrolyte with Engineered Layers, *J. Am. Chem. Soc.* 140 (2017) 82-85.
- [6] J. Lu; Y. Liu; P. Yao; Z. Ding; Q. Tang; J. Wu; Z. Ye; K. Huang; X. Liu, Hybridizing poly(vinylidene fluoride-co-hexafluoropropylene) with Li<sub>6.5</sub>La<sub>3</sub>Zr<sub>1.5</sub>Ta<sub>0.5</sub>O<sub>12</sub> as a lithium-ion electrolyte for solid state lithium metal batteries, *Chem. Eng. J.* 367 (2019) 230-238.
